# Supplementary material for: Trapping an unusual pentacoordinate carbon atom in a neutral trialuminum complex
Source: Royal Society of Chemistry journal article supplement (doi:10.1039/d1cc04265c), 2021-01-01
Supplement: d1cc04265c2.pdf [file d1cc04265c2.pdf]

**Electronic Supplementary Information for:**

**Trapping an Unusual Pentacoordinate Carbon Atom in a Neutral  
Trialuminum Complex**

*Nery Villegas-Escobar<sup>1,\*</sup>, Javier Martínez<sup>2</sup>, Ricardo A. Matute<sup>1,3</sup>, Sebastián Saltarini<sup>4</sup>,  
Constantin G. Daniliuc<sup>5</sup>, Lutz Gade<sup>6</sup>, and René S. Rojas<sup>4\*</sup>*

<sup>1</sup>Centro Integrativo de Biología y Química Aplicada (CIBQA)  
Universidad Bernardo O'Higgins, General Gana 1702,  
Santiago 8370854, Chile

<sup>2</sup>Instituto de Ciencias Químicas, Facultad de Ciencias, Isla Teja, Universidad Austral de Chile, 5090000 Valdivia, Chile.

<sup>3</sup>Division of Chemistry and Chemical Engineering, California Institute of Technology, Pasadena, CA.

<sup>4</sup>Laboratorio de Química Inorgánica, Facultad de Química y Farmacia, Pontificia Universidad Católica de Chile, Santiago 6094411, Chile.

<sup>5</sup>Organisch-Chemisches Institut der Universität Münster, 48149 Münster, Germany

<sup>6</sup>Anorganisch-Chemisches Institut, Universität Heidelberg, Im Neuenheimer Feld 270, 69120 Heidelberg, Germany

[nery.villegas@ubo.cl](mailto:nery.villegas@ubo.cl), [rrojasg@uc.cl](mailto:rrojasg@uc.cl)

## TABLE OF CONTENTS

|                                                                                                                                                                                                                               |     |
|-------------------------------------------------------------------------------------------------------------------------------------------------------------------------------------------------------------------------------|-----|
| <b>Experimental Section</b>                                                                                                                                                                                                   | S1  |
| <b>Figure S1.</b> $^1\text{H}$ -NMR spectrum of complex <b>1</b> in $\text{CDCl}_3$                                                                                                                                           | S2  |
| <b>Figure S2.</b> $^1\text{H}$ -NMR spectrum of complex <b>1</b> in $\text{CDCl}_3$ (region 8.0-4.4 ppm)                                                                                                                      | S2  |
| <b>Figure S3.</b> $^1\text{H}$ -NMR spectrum of complex <b>1</b> in $\text{CDCl}_3$ (region 3.0-(-1.5) ppm)                                                                                                                   | S3  |
| <b>Figure S4.</b> $^{13}\text{C}\{^1\text{H}\}$ -NMR spectrum of complex <b>1</b> in $\text{CDCl}_3$ .                                                                                                                        | S3  |
| <b>Figure S5.</b> $^1\text{H}$ - $^{13}\text{C}$ g-HSQC spectrum of complex <b>1</b>                                                                                                                                          | S4  |
| <b>Figure S6.</b> HRMS (ESI): $m/z$ $[\text{M}+\text{H}]^+$ for complex <b>1</b> .                                                                                                                                            | S4  |
| <b>X-Ray diffraction studies</b>                                                                                                                                                                                              | S5  |
| <b>Figure S7.</b> X-ray structure. Ellipsoids are drawn using 30% probability.                                                                                                                                                | S5  |
| <b>Table S1.</b> Crystallographic data and structure refinement of complex <b>1</b> .                                                                                                                                         | S6  |
| <b>Table S2.</b> Principal bond distances ( $\text{\AA}$ ) for complex <b>1</b>                                                                                                                                               | S7  |
| <b>Table S3.</b> Principal bond angles ( $^\circ$ ) for complex <b>1</b>                                                                                                                                                      | S8  |
| <b>Computational Section</b>                                                                                                                                                                                                  | S9  |
| <b>Computational Results</b>                                                                                                                                                                                                  | S9  |
| <b>Table S4.</b> Comparison between crystal and optimized structures                                                                                                                                                          | S9  |
| <b>Table S5.</b> Comparison of other Al-C bond distances in similar $\text{Al}_3$ -( $\mu^3$ - $\text{CH}_2$ ) moieties.                                                                                                      | S10 |
| <b>QTAIM</b>                                                                                                                                                                                                                  | S10 |
| <b>Figure S8.</b> Laplacian of the electron density map and bond critical points (BCPs) in blue balls around the pentacoordinate carbon atom. Value of the density at BCPs (a.u.) and Mayer bond orders MBOs (in parenthesis) | S11 |
| <b>Figure S9.</b> Key bond critical points (BCPs) on the molecular structure. Density and Laplacian of the electron density at each BCP. Values in atomic units (a.u.)                                                        | S11 |
| <b>Figure S10.</b> Bond and ring critical points together with bond paths are shown for complex <b>1</b>                                                                                                                      | S12 |
| <b>Figure S11.</b> Superposition of molecular structures obtained at the wB97XD/6-31G and wB97XD/def2-TZVPP (quadrants). RMSD = 0.0372                                                                                        | S12 |
| <b>Figure S12.</b> Results from trajectory. (a) total energy, (b) HOMO-LUMO gap, (c) HOMO energy (d) LUMO energy                                                                                                              | S13 |
| <b>XYZ coordinates</b>                                                                                                                                                                                                        | S14 |
| <b>References:</b>                                                                                                                                                                                                            | S16 |
